# Supplementary material for: Using Bayesian spatial models to map and to identify geographical hotspots of multidrug-resistant tuberculosis in Portugal between 2000 and 2016
Source: PubMed Central journal article supplement (PMC7538940; doi:10.1038/s41598-020-73759-w), 2020-10-06
Supplement: 41598_2020_73759_MOESM1_ESM.pdf [file 41598_2020_73759_MOESM1_ESM.pdf]

## Using Bayesian spatial models to map and to identify geographical hotspots of multidrug-resistant tuberculosis in Portugal between 2000 and 2016

Olena Oliveira, Ana Isabel Ribeiro, Elias Teixeira Krainski, Teresa Rito, Raquel Duarte, Margarida Correia-Neves

**Supplementary Table S1. The absolute annual number of multidrug-resistant tuberculosis (MDR-TB) and non-MDR-TB cases, in Continental Portugal, from 2000 to 2016.**

| Year         | MDR-TB     | Non-MDR-TB   | Total        |
|--------------|------------|--------------|--------------|
| 2000         | 50         | 4417         | 4467         |
| 2001         | 43         | 4315         | 4358         |
| 2002         | 47         | 4528         | 4575         |
| 2003         | 43         | 4159         | 4202         |
| 2004         | 56         | 3804         | 3860         |
| 2005         | 45         | 3536         | 3581         |
| 2006         | 31         | 3390         | 3421         |
| 2007         | 47         | 3078         | 3125         |
| 2008         | 30         | 2851         | 2881         |
| 2009         | 26         | 2743         | 2769         |
| 2010         | 28         | 2622         | 2650         |
| 2011         | 33         | 2499         | 2532         |
| 2012         | 23         | 2510         | 2533         |
| 2013         | 16         | 2312         | 2328         |
| 2014         | 25         | 2160         | 2185         |
| 2015         | 22         | 2076         | 2098         |
| 2016         | 18         | 1834         | 1852         |
| <b>Total</b> | <b>583</b> | <b>52834</b> | <b>53417</b> |

**Supplementary Table S2. Comparison of the patient's characteristics between groups: MDR-TB (583 cases) with non-MDR-TB random sample I (583 cases) and MDR-TB (583 cases) with non-MDR-TB random sample II (583 cases).**

| Patient's characteristics |                 | MDR-TB<br>n (IQR or %) | Non-MDR-TB<br>random<br>sample I<br>n (IQR or %) | <i>p-value</i> | Non-MDR-TB<br>random<br>sample II<br>n (IQR or %) | <i>p-value</i> |
|---------------------------|-----------------|------------------------|--------------------------------------------------|----------------|---------------------------------------------------|----------------|
| Age (years)               | Median (IQR)    | 40.0 (19)              | 43.0 (26)                                        | 0.015          | 43.0 (26)                                         | 0.004          |
| Gender                    | Female          | 174 (29.8)             | 199 (34.1)                                       | 0.132          | 198 (34.0)                                        | 0.148          |
|                           | Male            | 409 (70.2)             | 384 (65.9)                                       |                | 385 (66.0)                                        |                |
| Country of origin         | Foreign-born    | 159 (27.3)             | 85 (14.6)                                        | <0.001         | 79 (13.6)                                         | <0.001         |
|                           | Native          | 424 (72.7)             | 498 (85.4)                                       |                | 504 (86.4)                                        |                |
| HIV status                | Negative        | 421 (72.2)             | 522 (89.5)                                       | <0.001         | 514 (88.2)                                        | <0.001         |
|                           | Positive        | 162 (27.8)             | 61 (10.5)                                        |                | 69 (11.8)                                         |                |
| Alcohol abuse             | No              | 386 (75.5)             | 436 (82.1)                                       | 0.012          | 457 (86.1)                                        | <0.001         |
|                           | Yes             | 125 (24.5)             | 95 (17.9)                                        |                | 74 (13.9)                                         |                |
| Injectable drug use       | No              | 415 (79.7)             | 481 (89.6)                                       | <0.001         | 492 (91.1)                                        | <0.001         |
|                           | Yes             | 106 (20.3)             | 56 (10.4)                                        |                | 48 (8.9)                                          |                |
| Reclusion                 | No              | 481 (93.8)             | 523 (98.1)                                       | 0.001          | 529 (98.1)                                        | 0.001          |
|                           | Yes             | 32 (6.2)               | 10 (1.9)                                         |                | 10 (1.9)                                          |                |
| Community residence       | No              | 480 (94.6)             | 514 (96.6)                                       | 0.212          | 523 (96.7)                                        | 0.192          |
|                           | Yes             | 26 (5.1)               | 18 (3.4)                                         |                | 18 (3.3)                                          |                |
| Homelessness              | No              | 490 (96.3)             | 524 (98.3)                                       | 0.065          | 532 (98.0)                                        | 0.140          |
|                           | Yes             | 19 (3.7)               | 9 (1.7)                                          |                | 11 (2.0)                                          |                |
| Diabetes                  | No              | 557 (95.5)             | 556 (95.4)                                       | 1.000          | 551 (94.5)                                        | 0.501          |
|                           | Yes             | 26 (4.5)               | 27 (4.6)                                         |                | 32 (5.5)                                          |                |
| Silicose                  | No              | 578 (99.1)             | 578 (99.1)                                       | 1.000          | 578 (99.1)                                        | 1.000          |
|                           | Yes             | 5 (0.9)                | 5 (0.9)                                          |                | 5 (0.9)                                           |                |
| Previous TB treatment     | No              | 348 (59.7)             | 515 (88.3)                                       | <0.001         | 529 (90.7)                                        | <0.001         |
|                           | Yes             | 235 (40.3)             | 68 (11.7)                                        |                | 54 (9.3)                                          |                |
| Site of disease           | Pulmonary       | 530 (91.1)             | 422 (72.5)                                       | <0.001         | 415 (71.3)                                        | <0.001         |
|                           | Extra-pulmonary | 52 (8.9)               | 160 (27.5)                                       |                | 167 (28.7)                                        |                |

TB=tuberculosis; MDR-TB= multidrug- resistant tuberculosis; n= number of cases; IQR= interquartile range; HIV =human immunodeficiency virus.

**Supplementary Table S3. High-risk areas (standardized notification ratio is significantly above 1, i.e., above the country's average) for non-MDR-TB and MDR-TB, Continental Portugal, 2000-2016.**

| Region                   | Municipality                   | Non-MDR-TB (snr) | MDR-TB (snr) |
|--------------------------|--------------------------------|------------------|--------------|
| NORTH                    | Vila Nova de Cerveira          | 1.21             | nd           |
|                          | Viana do Castelo               | 1.10             | nd           |
|                          | Esposende                      | 1.32             | nd           |
|                          | Póvoa de Varzim <sup>a</sup>   | 1.67             | nd           |
|                          | Vila do Conde <sup>a</sup>     | 1.84             | nd           |
|                          | Gondomar <sup>a</sup>          | 1.57             | nd           |
|                          | Vila Nova de Gaia <sup>a</sup> | 1.20             | nd           |
|                          | Maia <sup>a</sup>              | 1.27             | nd           |
|                          | Matosinhos <sup>a</sup>        | 1.64             | nd           |
|                          | Paredes <sup>a</sup>           | 1.25             | nd           |
|                          | Penafiel                       | 2.66             | nd           |
|                          | Porto <sup>a,b</sup>           | 2.24             | 1.71         |
|                          | Valongo <sup>a</sup>           | 1.61             | nd           |
|                          | Marco de Canaveses             | 1.98             | nd           |
|                          | Espinho <sup>a</sup>           | 1.24             | nd           |
|                          | Castelo de Paiva               | 1.14             | nd           |
|                          | Cinfães                        | 1.39             | nd           |
| Resende                  | 1.69                           | nd               |              |
| LISBON Metropolitan Area | Cascais                        | 1.20             | nd           |
|                          | Lisboa <sup>b</sup>            | 1.81             | 3.49         |
|                          | Loures <sup>b</sup>            | 1.25             | 2.12         |
|                          | Oeiras <sup>b</sup>            | 1.32             | 1.90         |
|                          | Sintra <sup>b</sup>            | 1.18             | 2.50         |
|                          | Amadora <sup>b</sup>           | 1.89             | 2.99         |
|                          | Odivelas <sup>b</sup>          | 1.24             | 2.97         |
|                          | Almada <sup>b</sup>            | 1.42             | 1.79         |
|                          | Alcochete                      | 1.26             | nd           |
|                          | Moita                          | 1.28             | nd           |
| Setúbal                  | 1.25                           | nd               |              |
| ALENTEJO                 | Sines                          | 1.23             | nd           |
|                          | Aljustrel                      | 1.38             | nd           |
|                          | Almodôvar                      | 1.36             | nd           |
|                          | Odemira                        | 1.08             | nd           |
| ALGARVE                  | Faro                           | 1.18             | nd           |
|                          | Loulé                          | 1.37             | nd           |
|                          | Olhão                          | 1.06             | nd           |

TB=tuberculosis; MDR-TB= multidrug- resistant tuberculosis

snr: standardized notification ratio; nd: not significantly different from country's average.

<sup>a</sup> Porto Metropolitan Area.

<sup>b</sup> High-risk areas for both MDR- and non-MDR-TB.

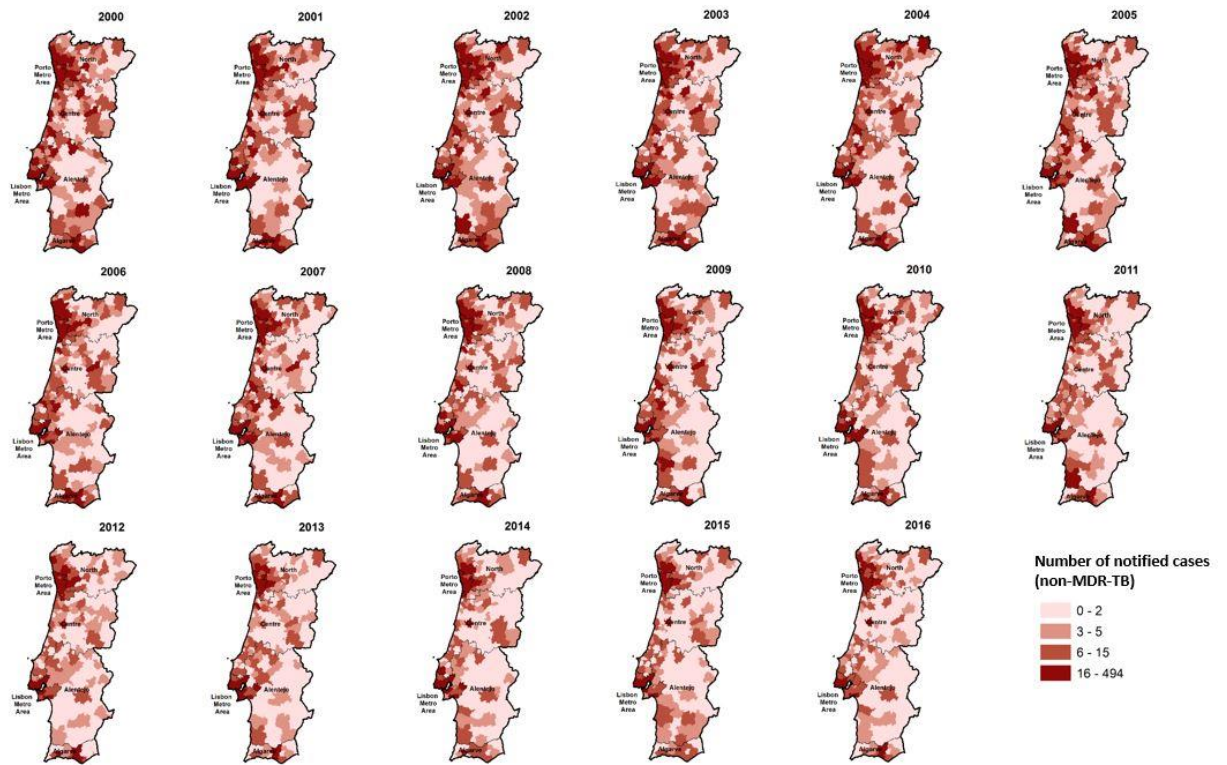

**Supplementary Figure S1. Maps depicting a time series of the number of non-MDR-TB cases by municipality year by year, Continental Portugal, 2000-2016.** TB=tuberculosis; MDR-TB= multidrug-resistant tuberculosis; the colour code displays the number of notified cases, from 0 to 494 cases.

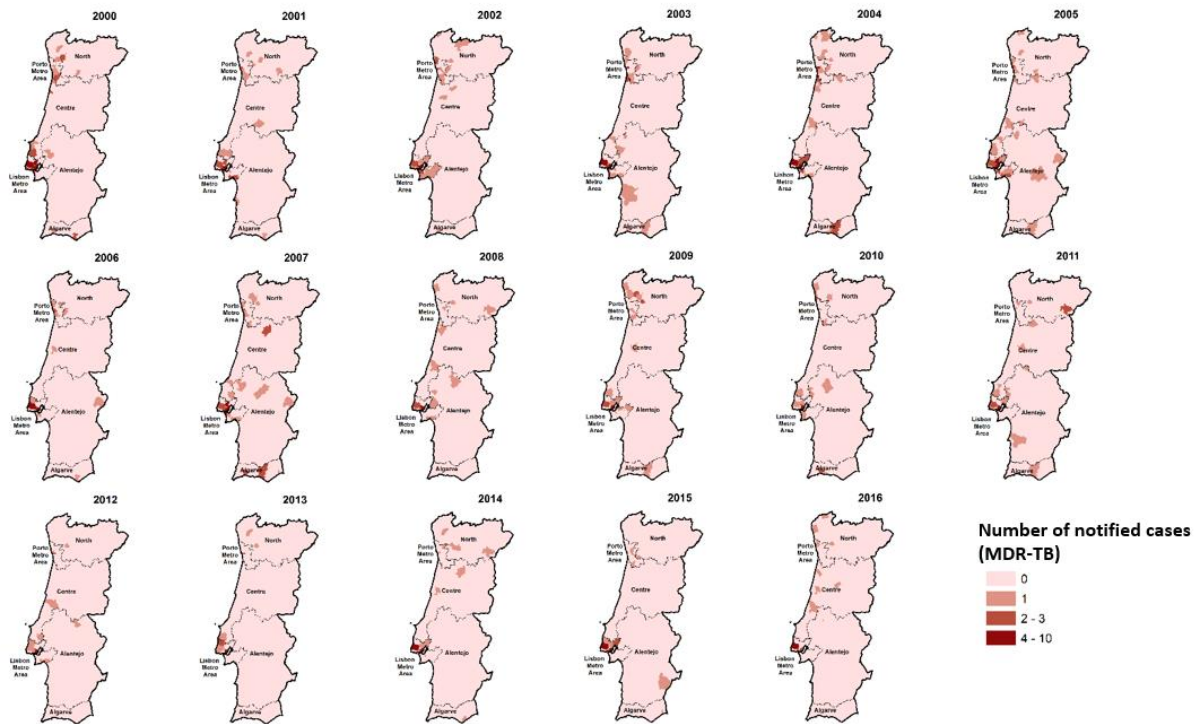

**Supplementary Figure S2. Maps depicting a time series of the number of MDR-TB cases by municipality year by year, Continental Portugal, 2000-2016.** TB=tuberculosis; MDR-TB= multidrug- resistant tuberculosis; the colour code displays the number of notified cases, from 0 to 10 cases.
